# Supplementary material
Source: PubMed Central journal article supplement (PMC6902249)
Supplement: jamapediatr-174-e194498-s001.pdf [file jamapediatr-174-e194498-s001.pdf]

## Supplementary Online Content

Andes LJ, Cheng YJ, Rolka DB, Gregg EW, Imperatore G. Prevalence of prediabetes among adolescents and young adults in the United States, 2005-2016. *JAMA Pediatr*. Published online December 2, 2019. doi:10.1001/jamapediatrics.2019.4498

**eFigure.** Kernel Density Distributions of Fasting Plasma Glucose, 2-hour Plasma Glucose, and Glycated Hemoglobin A1c

**eTable 1.** Median Fasting Plasma Glucose, 2-hour Plasma Glucose and Glycated Hemoglobin (A1c)

**eTable 2.** Distribution of Glucose Metabolism Abnormalities by Age Group and Race/Ethnicity

This supplementary material has been provided by the authors to give readers additional information about their work.

**eFigure.** Kernel Density Distributions of Fasting Plasma Glucose, 2-hour Plasma Glucose, and Glycated Hemoglobin A1c

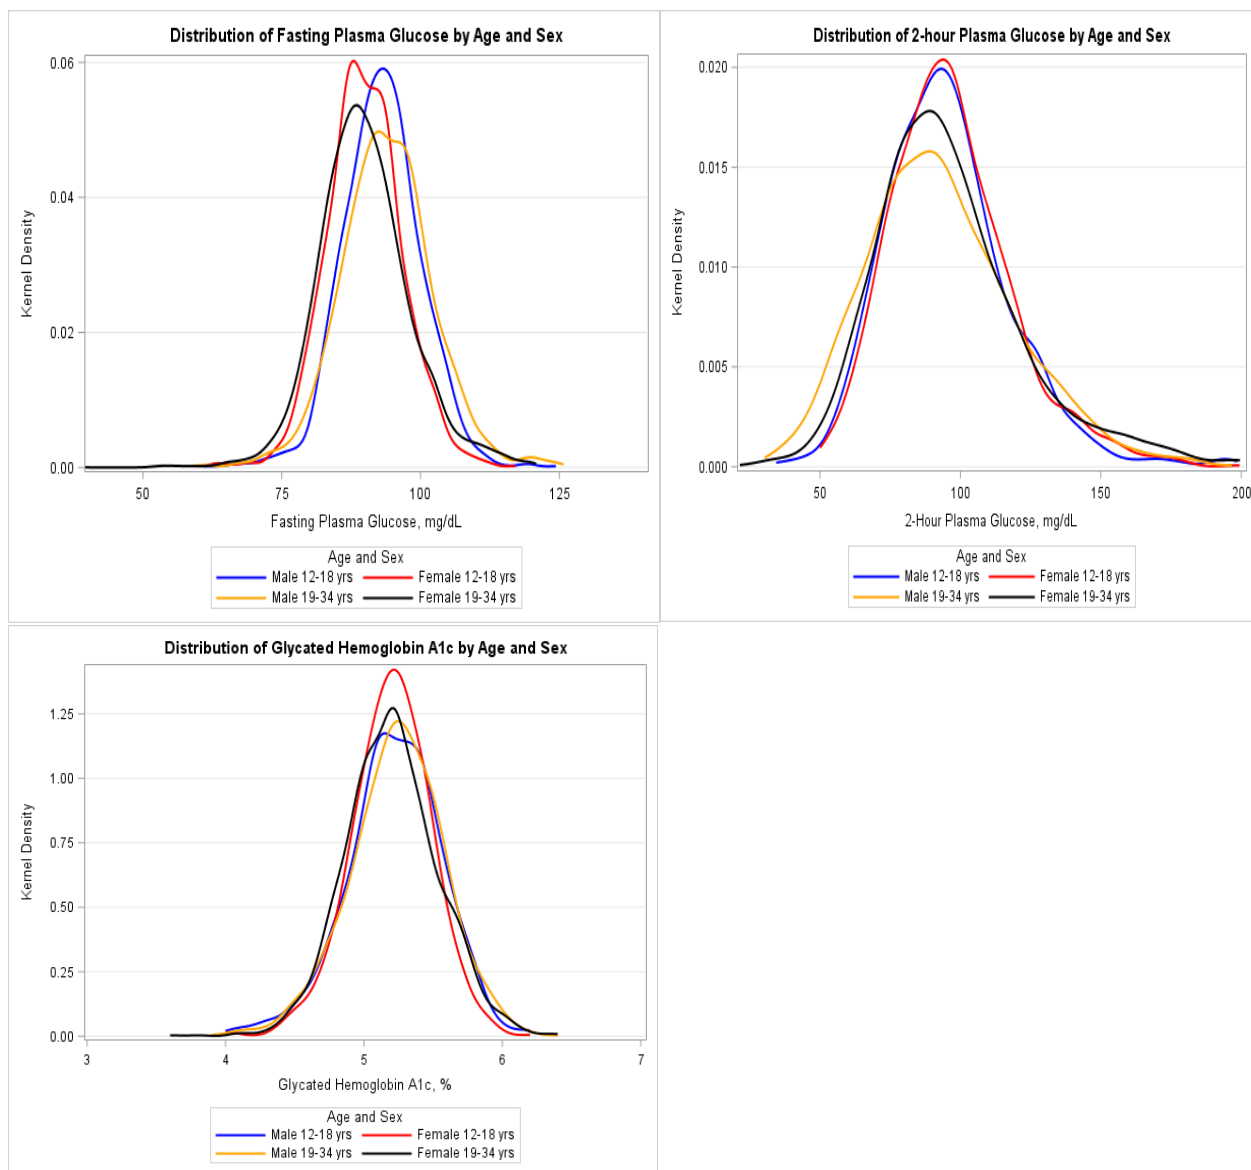

**eTable 1.** Median Fasting Plasma Glucose, 2-hour Plasma Glucose and Glycated Hemoglobin (A1c)

|                       | Median (95% Confidence Intervals) |                       |                         |
|-----------------------|-----------------------------------|-----------------------|-------------------------|
|                       | Fasting Plasma Glucose            | 2-hour Plasma Glucose | Glycated Hemoglobin A1c |
| Age group 12-18 years |                                   |                       |                         |
| Males                 | 93.0 (92.4-93.6)                  | 92.4 (90.7-94.3)      | 5.15 (5.11-5.19)        |
| Females               | 89.1 (88.5-90.3)                  | 92.9 (90.4-95.7)      | 5.15 (5.12-5.17)        |
| Age group 19-34 years |                                   |                       |                         |
| Males                 | 93.3 (92.5-94.32)                 | 89.6 (88.2-91.9)      | 5.17 (5.14-5.19)        |
| Females               | 88.8 (88.3-89.5)                  | 91.5 (90.3-93.5)      | 5.11 (5.08-5.13)        |

**eTable 2.** Distribution of Glucose Metabolism Abnormalities by Age Group and Race/Ethnicity

|                           | Age 12-18 Years     |                     |                  | Age 19-34 Years     |                     |                  |
|---------------------------|---------------------|---------------------|------------------|---------------------|---------------------|------------------|
|                           | White, Non-Hispanic | Black, Non-Hispanic | Hispanic         | White, Non-Hispanic | Black, Non-Hispanic | Hispanic         |
| Normal                    | 84.5 (81.2-87.4)    | 77.1 (72.9-80.8)    | 76.7 (72.9-80.1) | 78.7 (75.5-81.7)    | 71.8 (68.0-75.3)    | 70.1 (66.1-73.8) |
| IFG only                  | 9.5 (7.5-11.9)      | 4.8 (3.2-7.1)       | 13.1 (10.5-16.1) | 12.4 (9.9-15.4)     | 6.4 (4.4-9.2)       | 11.8 (9.8-14.2)  |
| IGT only                  | 3.4 (2.2-5.1)       | 0.8 (0.3-1.8)       | 2.2 (1.5-3.4)    | 3.3 (2.4-4.6)       | 1.6 (0.8-3.1)       | 3.9 (2.5-5.8)    |
| Increased A1c only        | 1.7 (0.9-3.2)       | 13.0 (10.4-16.1)    | 3.2 (2.0-5.1)    | 2.3 (1.5-3.4)       | 14.9 (12.2-18.1)    | 5.6 (4.2-7.5)    |
| IFG + IGT                 | 0.8 (0.2-2.5)       | 0.5 (0.2-1.3)       | 0.9 (0.3-2.5)    | 0.8 (0.4-1.6)       | 0.7 (0.2-2.0)       | 3.1 (2.0-4.6)    |
| IFG + increased A1c       | 0.1 (0.0-0.5)       | 2.4 (1.1-5.3)       | 2.6 (1.5-4.7)    | 1.6 (1.0-2.5)       | 2.8 (1.8-4.3)       | 3.6 (2.5-5.3)    |
| IGT + increased A1c       | 0.1 (0.0-0.5)       | 1.2 (0.5-2.6)       | 0.5 (0.2-1.2)    | 0.2 (0.1-0.7)       | 0.7 (0.3-1.9)       | 0.6 (0.3-1.3)    |
| IFG + IGT + increased A1c | 0                   | 0.3 (0.0-1.8)       | 0.8 (0.3-2.3)    | 0.6 (0.3-1.5)       | 1.1 (0.5-2.6)       | 1.3 (0.7-2.5)    |
|                           |                     |                     |                  |                     |                     |                  |
| All IFG                   | 10.4 (8.0-13.3)     | 7.9 (5.6-11.2)      | 17.4 (14.4-20.8) | 15.4 (12.7-18.6)    | 11.0 (8.5-14.2)     | 19.9 (16.8-23.4) |
| All IGT                   | 4.2 (2.8-6.2)       | 2.6 (1.6-4.4)       | 4.4 (3.0-6.3)    | 5.0 (3.8-6.5)       | 4.1 (2.9-5.9)       | 8.8 (6.9-11.2)   |
| All increased A1c         | 1.8 (1.0-3.3)       | 16.9 (13.3-21.1)    | 7.1 (5.0-10.1)   | 4.7 (3.5-6.4)       | 19.5 (16.5-22.9)    | 11.2 (9.2-13.6)  |
| Any prediabetes           | 15.5 (12.6-18.8)    | 22.9 (19.2-27.1)    | 23.3 (19.9-27.1) | 21.3 (18.3-24.5)    | 28.2 (24.7-32.0)    | 29.9 (26.2-33.9) |
